# Supplementary material
Source: PubMed Central journal article supplement (PMC9582043)

Supplemental Figure. Principal coordinate analysis (PCoA) plot of unweighted UniFrac distances between gut bacterial microbiota from stool samples from children with attention deficit hyperactivity disorder (ADHD; red triangle) and neurotypical (NT) children (blue circle). Data are presented at 1 month and 6 months.

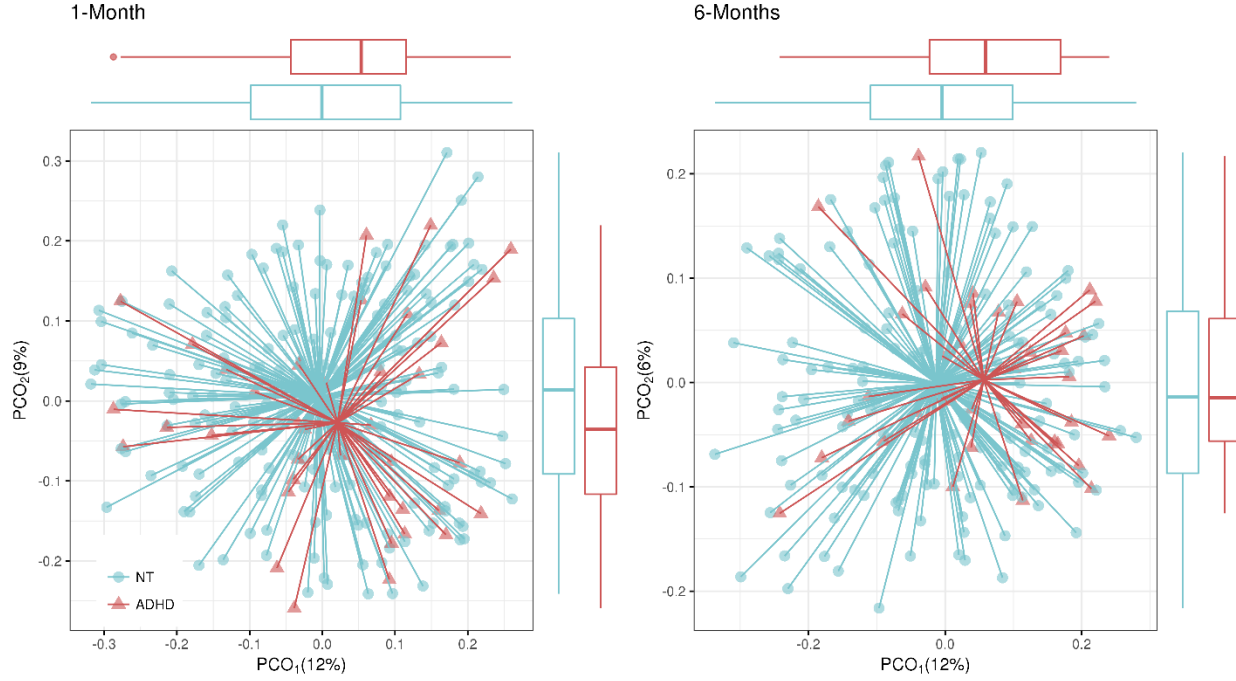

Supplement: NIHMS1792597-supplement-1792597_Sup_Fig.pdf [file NIHMS1792597-supplement-1792597_Sup_Fig.pdf]
