# Supplementary material
Source: PubMed Central journal article supplement (PMC9582043)
Supplement: NIHMS1792597-supplement-1792597_Sup_Tab_1.pdf [file NIHMS1792597-supplement-1792597_Sup_Tab_1.pdf]

**Table S1. Difference in stool alpha diversity comparing children with ADHD to NT children**

| Time             | Metric                | Unadjusted |                  |         | Adjusted <sup>a</sup> |                  |         |
|------------------|-----------------------|------------|------------------|---------|-----------------------|------------------|---------|
|                  |                       | N          | $\beta^b \pm SE$ | p-value | N                     | $\beta^b \pm SE$ | p-value |
| <b>Bacterial</b> |                       |            |                  |         |                       |                  |         |
| 1-month          | Richness              | 229        | 4.87 ± 8.50      | 0.57    | 216                   | 6.47 ± 8.78      | 0.46    |
|                  | Evenness              | 229        | -0.004 ± 0.02    | 0.82    | 216                   | -0.006 ± 0.02    | 0.75    |
|                  | Diversity (Shannon's) | 229        | -0.002 ± 0.10    | 0.98    | 216                   | -0.008 ± 0.11    | 0.94    |
|                  | Diversity (Faith's)   | 229        | -0.02 ± 0.45     | 0.97    | 216                   | 0.03 ± 0.47      | 0.95    |
| 6-months         | Richness              | 202        | 19.17 ± 10.55    | 0.071   | 190                   | 15.174 ± 10.97   | 0.17    |
|                  | Evenness              | 202        | 0.02 ± 0.02      | 0.30    | 190                   | 0.02 ± 0.02      | 0.42    |
|                  | Diversity (Shannon's) | 202        | 0.14 ± 0.11      | 0.19    | 190                   | 0.12 ± 0.11      | 0.31    |
|                  | Diversity (Faith's)   | 202        | 1.26 ± 0.52      | 0.017   | 190                   | 1.29 ± 0.53      | 0.017   |
| <b>Fungal</b>    |                       |            |                  |         |                       |                  |         |
| 1-month          | Richness              | 107        | -1.32 ± 1.78     | 0.46    | 102                   | 0.02 ± 1.99      | 0.99    |
|                  | Evenness              | 92         | -0.12 ± 0.07     | 0.086   | 87                    | -0.15 ± 0.08     | 0.062   |
|                  | Diversity (Shannon's) | 107        | -0.28 ± 0.18     | 0.14    | 102                   | -0.27 ± 0.21     | 0.22    |
| 6-months         | Richness              | 102        | 2.59 ± 1.28      | 0.046   | 96                    | 2.57 ± 1.47      | 0.083   |
|                  | Evenness              | 95         | 0.06 ± 0.05      | 0.29    | 89                    | 0.02 ± 0.06      | 0.71    |
|                  | Diversity (Shannon's) | 102        | 0.24 ± 0.14      | 0.077   | 96                    | 0.19 ± 0.16      | 0.24    |

ADHD, attention deficit hyperactivity disorder; NT, neurotypical;  $\beta$ , parameter estimate, SE, standard error.

<sup>a</sup>Adjusted for exact age at stool sample collection, maternal prenatal body mass index, prenatal antifungal use, maternal smoking during pregnancy, child sex, mode of delivery, gestational age at delivery, parity, and breastfeeding status.

<sup>b</sup>Interpreted as the mean differences in alpha diversity metric, comparing ADHD to NT children.
